# Supplementary material for: Associations between early school wellbeing and mental health in England, mainland China and Hong Kong
Source: Research Square preprint supplement (doi:10.21203/rs.3.rs-8670511/v1), 2026-02-02
Supplement: Supplementary file 1 [file 1757d7358a7debee2a7350df.docx]

Supplementary materials for

**Associations between early school wellbeing and mental health in England,**

**mainland China and Hong Kong**

This file includes the following materials:

Full scalar invariance across modalities in Hong Kong children’s school wellbeing ratings

Table S1. *Tests of measurement invariance across modalities for Hong Kong child-rated school wellbeing*

Table S2. *Selection of the parent-rated SDQ Items for a two-factor measurement model*

Family adversity index

Table S3. *Raw-score descriptive statistics for each family adversity measure*

Table S4. *Raw-score descriptive statistics for child- and parent-rated school wellbeing per geographic context and item*

Table S5. *Raw-score descriptive statistics for the HIFAMS and the SDQ in the whole sample*

Partial scalar invariance across sites in parental ratings of mental health

Table S6. *Tests of measurement invariance for parent-rated mental health across sites*

**Full Scalar Invariance Across Modalities in Hong Kong Children’s School Wellbeing Ratings**

A total of 550 preschool-aged children (269 girls, 281 boys; 259 in Year 2 and 286 in Year 3) were recruited from five kindergartens in Hong Kong. All children completed the child-reported HIFAMS in person at school between October and December 2022, administered by trained local research assistants. Using the same stepwise procedure described in the main text, we specified the measurement model and examined measurement invariance across testing modalities (online versus in-person) for the child-reported HIFAMS (see Table S1).

We first evaluated a one-factor measurement model in which all seven items loaded onto a single wellbeing latent factor, allowing correlated residuals between item 3 (“doing work”) and item 6 (“think about teacher”). The model provided a good fit to the data when estimated separately for the online and in-person samples.

The across-modality measurement invariance of the latent wellbeing construct was then evaluated by imposing progressively stricter constraints. A *full scalar invariant* model, in which all factor loadings and all item thresholds were constrained to equality across testing modalities, did not result in a significant decrement in model fit relative to the *configural invariant* model, Δ*χ*²(11) = 19.65, *p* = .0503. This finding supports the validity of the child version of HIFAMS, suggesting that it functions equivalently across online and in-person testing contexts.

**Table S1.** *Tests of Measurement Invariance Across Modalities for Hong Kong Child-Rated School Wellbeing*

|  | *χ*2 | *df* | RMSEA [90% CI] | CFI | TLI | Comparison | Δ*χ*2 |
| --- | --- | --- | --- | --- | --- | --- | --- |
|  |  |  |  |  |  |  |  |
| Hong Kong child-rated school wellbeing |  |  |  |  |  |  |  |
| *Measurement CFA* |  |  |  |  |  |  |  |
| M1. Whole sample (*n* = 918) | 26.720 (*p* = .014) | 13 | 0.034 [0.015, 0.052] | 0.990 | 0.985 |  |  |
| M2. Online (*n* = 368) | 20.511 (*p* = .083) | 13 | 0.040 [0.000, 0.071] | 0.990 | 0.984 |  |  |
| M3. In-person (*n* = 550) | 22.224 (*p* = .052) | 13 | 0.036 [0.000, 0.061] | 0.986 | 0.977 |  |  |
| *Multiple-groups CFA* |  |  |  |  |  |  |  |
| M4: Equal form | 40.242 (*p* = .063) | 28 | 0.031 [0.000, 0.051] | 0.991 | 0.987 |  |  |
| M5: Equal form, loadings, and thresholds | 60.246 (*p* = .016) | 39 | 0.034 [0.015, 0.051] | 0.985 | 0.984 | M5 – M4 | 19.653 (*p* = .0503) |
|  |  |  |  |  |  |  |  |

*Note.* RMSEA, Root Mean Square Error of Approximation; 90% CI, 90% confidence interval for RMSEA; CFI, Comparative Fit Index; TLI, Tucker–Lewis Index. The WLSMV *χ*2 difference tests were used to compare models.

**Table S2.** *Selection of the Parent-Rated SDQ Items for a Two-Factor Measurement Model*

| Item | Inclusion | Exclusion |
| --- | --- | --- |
| **F1: Externalising problems** |  |  |
| *Conduct problems* |  |  |
| 5. Temper tantrums | √ |  |
| 7. Obedient* | √ |  |
| 12. Fights and bullies children |  | √ |
| 18. Lies and cheats |  | √ |
| 22. Steals |  | √ |
| *Hyperactivity* |  |  |
| 2. Restless | √ |  |
| 10. Constantly fidgeting | √ |  |
| 15. Easily distracted | √ |  |
| 21. Thinks things out* | √ |  |
| 25. Sees task through to end* | √ |  |
| **F2: Internalising problems** |  |  |
| *Emotion problems* |  |  |
| 3. Complaints of headaches |  | √ |
| 8. Many worries | √ |  |
| 13. Often unhappy and tearful | √ |  |
| 16. Nervous and clingy | √ |  |
| 24. Many fears and easily scared | √ |  |
| *Peer problems* |  |  |
| 6. Solitary play | √ |  |
| 11. At least one good friend* |  | √ |
| 14. Liked by other children* |  | √ |
| 19. Picked on and bullied | √ |  |
| 23. Gets on better with adults |  | √ |
|  |  |  |

*Note*. *Reverse scored.

**Family Adversity Index**

To capture multiple dimensions of family adversity, we combined seven parent-reported measures. Each measure was recoded within each site into a binary variable, reflecting the *presence* (1) or *absence* (0) of risk. These binary scores were then summed to generate a cumulative adversity score, yielding a possible range of 0 to 7. The seven measures were as follows:

- Parental education: Highest level of parental educational attainment, coded as 1 = no degree-level education (risk), and 0 = undergraduate degree or higher (no/low risk).
- Perceived social standing: Measured using the Ladder of Subjective Social Status (Singh-Manoux et al., 2003), on which a 10-rung scale denotes perceived levels of educational qualification, employment, and income. Scores in the lowest quartile within each site were coded as 1 = risk, with higher scores coded as 0 = no/low risk.
- Parental nonspecific psychological distress: Measured using the 10-item Kessler Psychological Distress Scale (Kessler et al., 2003) on a 5-point scale (0 = *none of the time*, 4 = *all of the time*). Item scores were summed (range 0–40), with higher numbers indicating greater psychological distress. Total scores in the upper quartile within each site were coded as 1 = risk, and all others as 0 = no/low risk.
- Parental depressive symptoms: Measured using the 9-item Patient Health Questionnaire (Kroenke et al., 2003) on a 4-point scale (0 = *not at all*, 3 = *nearly every day*). Item scores were summed (range 0–27), with higher numbers indicating greater depression severity. Total scores in the upper quartile within each site were coded as 1 = risk, and all others as 0 = no/low risk.
- Parental anxiety symptoms: Measured using the 7-item Generalized Anxiety Disorder Scale (Spitzer et al., 2006) on a 4-point scale (0 = *not at all*, 3 = *nearly every day*). Item scores were summed (range 0–21), with higher numbers indicating greater anxiety severity. Total scores in the upper quartile within each site were coded as 1 = risk, and all others as 0 = no/low risk.
- Pandemic family stress: Measured using 24 selected items from the COVID-19 Family Stressor Scale (Prime et al., 2021) on a 3-point scale (1 = *not true*, 3 = *very true*). Item scores were summed (range 24–65), with higher numbers indicating greater COVID-related family stress. Total scores in the upper quartile within each site were coded as 1 = risk, and all others as 0 = no/low risk.
- Negative life events: Measured using 18 selected items (e.g., the occurrence of divorce, job loss, death of a family member) from the Recent Life Events Questionnaire (Brugha et al., 1985) on a binary scale (0 = *no*, 1 = *yes*). Item scores were summed (range 0–18), with higher numbers indicating more exposure to negative life events. Total scores in the upper quartile within each site were coded as 1 = risk, and all others as 0 = no/low risk.

***References***

Brugha, T., Bebbington, P., Tennant, C., & Hurry, J. (1985). The List of Threatening Experiences: A subset of 12 life event categories with considerable long-term contextual threat. *Psychological Medicine*, *15*(1), 189–194. <https://doi.org/10.1017/s003329170002105x>

Singh-Manoux, A., Adler, N. E., & Marmot, M. G. (2003). Subjective social status: Its determinants and its association with measures of ill-health in the Whitehall II study. *Social Science & Medicine*, *56*(6), 1321–1333. <https://doi.org/10.1016/s0277-9536(02)00131-4>

Kessler, R.C., Andrews, G., Colpe, L. J., Hiripi, E., Mroczek, D. K., Normand, S. L., ... & Zaslavsky, A. M. (2002). Short screening scales to monitor population prevalences in non-specific psychological distress. *Psychological Medicine*, *32*(6), 959–956. <https://doi.org/10.1017/s0033291702006074>

Kroenke, K., Spitzer, R. L., Williams, J. B., & Löwe, B. (2010). The patient health questionnaire somatic, anxiety, and depressive symptom scales: A systematic review*. General Hospital Psychiatry*, *32*(4), 345–359. <https://doi.org/10.1016/j.genhosppsych.2010.03.006>

Spitzer, R. L., Kroenke, K., Williams, J. B., & Löwe, B. (2006). A brief measure for assessing generalized anxiety disorder: The GAD-7. *Archives of Internal Medicine*, *166*(10), 1092–1097. <https://doi.org/10.1001/archinte.166.10.1092>

Prime, H., Wade, M., May, S. S., Jenkins, J. M., & Browne, D. T. (2021). The COVID-19 family stressor scale: Validation and measurement invariance in female and male caregivers. *Frontiers in Psychiatry*, *12*. <https://doi.org/10.3389/fpsyt.2021.669106>

**Table S3.** *Raw-Score Descriptive Statistics for Each Family Adversity Measure*

|  |  |  |  |  |  |  |
| --- | --- | --- | --- | --- | --- | --- |
|  | *n* | Internal consistency | ENG | HK | MC | Effect size for  group difference |
|  | *M* (*SD*) | *M* (*SD*) | *M* (*SD*) |
|  |  |  |  |  |  |  |
| **Family adversity** |  |  |  |  |  |  |
| Parent education (% degree-level) | 1,138 |  | 333 (85%) | 193 (54%) | 312 (80%) | Cramér’s *V* = 0.31 |
| Perceived social standing | 1,105 |  | 6.43 (1.43) | 6.10 (1.63) | 5.97 (1.51) | *η*2 = 0.02 |
| Non-specific psychological distressa | 1,110 | *α* = .92 | 7.81 (5.97) | 10.40 (7.21) | 8.63 (7.06) | *η*2 = 0.02 |
| Depressiona | 1,106 | *α* = .86 | 4.22 (4.42) | 4.23 (3.79) | 3.91 (4.02) | *η*2 = 0.001 |
| Anxietya | 1,102 | *α* = .90 | 3.40 (3.54) | 3.65 (3.88) | 3.18 (3.67) | *η*2 = 0.003 |
| Pandemic family stressa | 1,110 | *α* = .86 | 35.38 (7.00) | 32.05 (6.76) | 30.09 (5.70) | *η*2 = 0.10 |
| Negative life eventsa | 1,102 | *α* = .68 | 1.58 (1.68) | 1.90 (2.26) | 2.23 (2.32) | *η*2 = 0.02 |
|  |  |  |  |  |  |  |

*Note.* a Total scores. ENG = England; HK = Hong Kong; MC = mainland China.

**Table S4.** *Raw-Score Descriptive Statistics for Child- and Parent-Rated School Wellbeing per Geographic Context and Item*

|  | School wellbeing raw scores | | | | | |
| --- | --- | --- | --- | --- | --- | --- |
|  | Child-rated  (2 = *happy*, 1 = *ok*, 0 = *sad*) | | | Parent-rated  (5 = *very happy*, 1 = *very unhappy*) | | |
|  | ENG | HK | MC | ENG | HK | MC |
| Item | *M* ± *SD* | *M* ± *SD* | *M* ± *SD* | *M* ± *SD* | *M* ± *SD* | *M* ± *SD* |
| 1. On my way to school I feel… | 1.68 ± 0.59 | 1.73 ± 0.61 | 1.66 ± 0.63 | 4.18 ± 0.69 | 4.19 ± 0.67 | 3.90 ± 0.86 |
| 2. When I am in the classroom I feel… | 1.55 ± 0.63 | 1.63 ± 0.67 | 1.64 ± 0.64 | 4.21 ± 0.63 | 4.23 ± 0.57 | 4.21 ± 0.62 |
| 3. When I am doing my work I feel… | 1.43 ± 0.72 | 1.36 ± 0.78 | 1.36 ± 0.77 | 4.26 ± 0.70 | 4.01 ± 0.64 | 3.88 ± 0.75 |
| 4. When I am in the playground I feel… | 1.87 ± 0.40 | 1.89 ± 0.39 | 1.88 ± 0.41 | 4.39 ± 0.70 | 4.47 ± 0.61 | 4.66 ± 0.54 |
| 5. When I think about the other children I feel… | 1.52 ± 0.66 | 1.69 ± 0.63 | 1.61 ± 0.67 | 4.03 ± 0.68 | 4.19 ± 0.59 | 4.26 ± 0.64 |
| 6. When I think about my teacher I feel… | 1.58 ± 0.62 | 1.49 ± 0.73 | 1.56 ± 0.70 | 4.06 ± 0.72 | 4.16 ± 0.63 | 4.12 ± 0.72 |
| 7. When I think about school I feel… | 1.58 ± 0.67 | 1.61 ± 0.70 | 1.59 ± 0.66 | 4.43 ± 0.64 | 4.15 ± 0.67 | 4.12 ± 0.72 |
| Total possible score  (child = 14, parent = 35) | 11.15 ± 2.67 | 11.40 ± 2.94 | 11.31 ± 2.66 | 29.48 ± 3.44 | 29.36 ± 3.26 | 29.15 ± 3.38 |

*Note.* ENG = England; HK = Hong Kong; MC = mainland China.

# **Table S5.** *Raw-Score Descriptive Statistics for the HIFAMS and the SDQ in the Whole Sample*

|  | *n* | *M* | *SD* | Min | Max | Skewness | Kurtosis | % Missing |
| --- | --- | --- | --- | --- | --- | --- | --- | --- |
| **School wellbeing (HIFAMS)** |  |  |  |  |  |  |  |  |
| Child ratings | 1,175 | 11.28 | 2.75 | 0 | 14 | -1.04 | 0.88 | 0.51% |
| Parental ratings | 1,124 | 29.33 | 3.36 | 14 | 35 | -0.34 | 0.38 | 4.83% |
| **Mental health (SDQ)** |  |  |  |  |  |  |  |  |
| Externalising problems | 1,124 | 5.57 | 3.11 | 0 | 14 | 0.48 | -0.31 | 4.83% |
| Internalising problems | 1,124 | 1.99 | 1.90 | 0 | 10 | 1.16 | 1.09 | 4.83% |
|  |  |  |  |  |  |  |  |  |

**Partial Scalar Invariance Across Sites in Parental Ratings of Mental Health**

Using the same stepwise procedure described in the main text, we specified the measurement model and examined measurement invariance across three sites for children’s mental health, as indexed by the parent-report version of the SDQ (see Table S6). We first evaluated a two-factor measurement model in which six items loaded onto an internalising-problems latent factor and seven items loaded onto an externalising-problems latent factor, with the two latent factors permitted to covary. Modification indices indicated correlated residuals between item 2 (“restless”) and item 10 (“constantly fidgeting”), between item 5 (“temper tantrums”) and item 7 (“obedient,” reverse-coded), and between item 16 (“nervous and clingy”) and item 24 (“many fears and easily scared”). The model provided a good fit to the data when estimated separately for each site and for the whole sample.

The across-site measurement invariance of the two-factor structure for latent mental health was then evaluated by imposing progressively stricter constraints. Consistent with prior work on the measurement equivalence of the SDQ (Chen et al., 2025), a *partial scalar invariant* model, in which all factor loadings and five item thresholds were constrained to equality in all three sites, did not result in a significant decrement in model fit relative to the *configural invariant* model, Δ*χ*²(18) = 21.12, *p* = .273. Recent simulation studies show that partial scalar invariance is sufficient to recover latent means and structural relations even when a substantial proportion (up to 80%) of parameters are non-invariant (e.g., Pokropek et al., 2019). This finding suggests that parents’ reports of child internalising and externalising problems are broadly comparable across the English, Hong Kong, and mainland Chinese samples.

Constraining latent means to equality across sites led to a significant reduction in model fit, Δ*χ*²(4) = 50.05, *p* < .001. However, when child age, child gender, and family adversity were taken into account by regressing both latent factors onto these covariates, latent mean differences relative to England (the reference group) were small and not statistically significant. Specifically, for externalising problems, latent mean differences were nonsignificant for both Hong Kong (*SE* = 1.07, *z* = 1.51, *p* = .130) and mainland China (*SE* = 0.93, *z* = 0.47, *p* = .641). Similarly, for internalising problems, latent mean differences were nonsignificant for Hong Kong (*SE* = 1.42, *z* = 1.46, *p* = .144) and mainland China (*SE* = 1.20, *z* = 0.33, *p* = .741).

***References***

Chen, L. L., Heng, J. A., Xu, C., Ellefson, M. R., Edwards, M., D’Souza, H., ... & Hughes, C. (2025). Links between child executive function and adjustment: A three‐site study. *Child Development*, *96*(5), 1590–1604. <https://doi.org/10.1111/cdev.14264>

Pokropek, A., Davidov, E., & Schmidt, P. (2019). A Monte Carlo simulation study to assess the appropriateness of traditional and newer approaches to test for measurement invariance. *Structural Equation Modeling: A Multidisciplinary Journal*, *26*, 724–744. <https://doi.org/10.1080/10705511.2018.1561293>

**Table S6.** *Tests of Measurement Invariance for Parent-Rated Mental Health Across Sites*

|  | *χ*2 | *df* | RMSEA [90% CI] | CFI | TLI | Comparison | Δ*χ*2 |
| --- | --- | --- | --- | --- | --- | --- | --- |
|  |  |  |  |  |  |  |  |
| A two-factor measurement model |  |  |  |  |  |  |  |
| *Measurement CFA* |  |  |  |  |  |  |  |
| M1. Whole sample (*n* = 1,124) | 377.827 (*p* < .001) | 61 | 0.068 [0.061, 0.075] | 0.951 | 0.937 |  |  |
| M2. England (*n* = 379) | 119.799 (*p* < .001) | 61 | 0.050 [0.037, 0.064] | 0.974 | 0.966 |  |  |
| M3. Hong Kong (*n* = 357) | 175.367 (*p* < .001) | 61 | 0.072 [0.060, 0.085] | 0.952 | 0.939 |  |  |
| M4. Mainland China (*n* = 388) | 168.891 (*p* < .001) | 61 | 0.068 [0.056, 0.080] | 0.959 | 0.948 |  |  |
| *Multiple-groups CFA* |  |  |  |  |  |  |  |
| M5: Equal form | 540.272 (*p* < .001) | 189 | 0.070 [0.064, 0.072] | 0.952 | 0.940 |  |  |
| M6: Equal form, loadings, and intercepts | 529.519 (*p* < .001) | 207 | 0.064 [0.058, 0.071] | 0.956 | 0.950 | M6 – M5 | 21.124 (*p* = .273) |
|  |  |  |  |  |  |  |  |

*Note.* RMSEA, Root Mean Square Error of Approximation; 90% CI, 90% confidence interval for RMSEA; CFI, Comparative Fit Index; TLI, Tucker–Lewis Index. The WLSMV *χ*2 difference tests were used to compare models.
